# Supplementary material for: Boron-doped onion-like carbon with enriched substitutional boron: the relationship between electronic properties and catalytic performance
Source: Royal Society of Chemistry journal article supplement (doi:10.1039/c5ta03141a), 2015-01-01
Supplement: c5ta03141a1.pdf [file c5ta03141a1.pdf]

## Supporting Information

### **Boron-doped onion-like carbon with enriched substitutional boron: relationship between electronic property and catalytic performance**

*Yangming Lin,<sup>a,b</sup> Yansong Zhu,<sup>b</sup> Bingsen Zhang,<sup>b</sup> Yoong Ahm Kim,<sup>c</sup> Morinobu Endo,<sup>d</sup> and Dang Sheng Su,<sup>b,e\*</sup>*

<sup>a</sup> School of Chemistry and Materials Science, University of Science and Technology of China, Hefei, 230026, China. Fax: +86-24-83970019; Tel: +86-24-83970029;

<sup>b</sup> Shenyang National Laboratory for Materials Science, Institute of Metal Research, Chinese Academy of Sciences, Shenyang, 110016, China. Fax: +86-24-83970019; Tel: +86-24-83970029;  
E-mail: [dssu@imr.ac.cn](mailto:dssu@imr.ac.cn)

<sup>c</sup> School of Polymer Science and Engineering, Chonnam National University, 77 Yongbong-ro, Buk-gu Kwangju, 500-757, Korea.

<sup>d</sup> Carbon Institute of Science and Technology, Shinshu University, 4-17-1 Wakasato, Nagano, 380-8553, Japan.

<sup>e</sup> Department of Inorganic Chemistry, Fritz Haber Institute of the Max Planck Society, Faradayweg 4-6, Berlin, 14195, Germany.

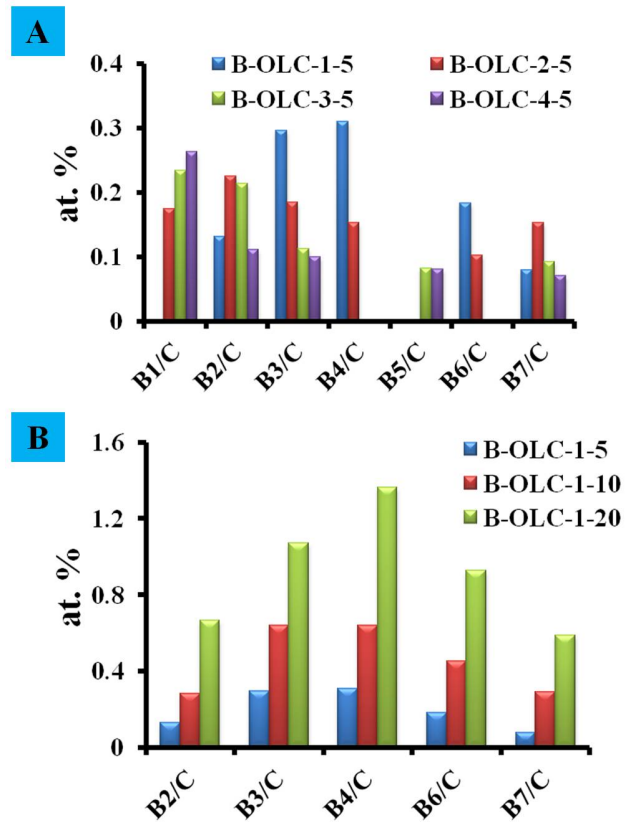

**Fig. S1** (A)-(B) the detailed  $B_x/C$  species distribution diagram of the various B-OLC samples.

**Table S1.** Distribution of element species obtained from the deconvolution of the C1s and B1s Peaks by XPS. <sup>(a)</sup>

| Entry                                             | Binding energy (eV) | FWHM (eV) | Bx/C      | At. %     |           |           |           |            |            |
|---------------------------------------------------|---------------------|-----------|-----------|-----------|-----------|-----------|-----------|------------|------------|
|                                                   |                     |           |           | B-OLC-1-5 | B-OLC-2-5 | B-OLC-3-5 | B-OLC-4-5 | B-OLC-1-10 | B-OLC-1-20 |
| boron atom cluster (B1)                           | ~186.5              | 1.25      | B1/C      | ---       | 0.174     | 0.234     | 0.27      | ---        | ---        |
| B <sub>4</sub> C (B2)                             | ~187.6              | 1.35      | B2/C      | 0.132     | 0.225     | 0.214     | 0.111     | 0.284      | 0.65       |
| substitutional boron species BC <sub>3</sub> (B3) | ~188.8              | 1.39      | B3/C      | 0.296     | 0.184     | 0.112     | 0.1       | 0.641      | 1.06       |
| BC <sub>2</sub> O (B4)                            | ~190.1              | 1.45      | B4/C      | 0.31      | 0.153     | ---       | ---       | 0.641      | 1.354      |
| B-N (B5)                                          | ~190.7              | 1.49      | B5/C      | ---       | ---       | 0.082     | 0.081     | ---        | ---        |
| BCO <sub>2</sub> (B6)                             | ~191.3              | 1.54      | B6/C      | 0.183     | 0.102     | ---       | ---       | 0.451      | 0.92       |
| B <sub>2</sub> O <sub>3</sub> (B7)                | >192.8              | 1.54      | B7/C      | 0.08      | 0.153     | 0.092     | 0.071     | 0.294      | 0.58       |
| Total boron                                       | 186.5~194.5         | 1.2~1.6   | Total B/C | 1.0       | 0.99      | 0.73      | 0.63      | 2.31       | 4.57       |

(a) The fitting is performed by fixing the peak maximum within  $\pm 0.1$  eV for all spectra and applying a full width half-maximum (FWHM) of 1.2-1.6 eV. The value of the mixed Gaussian-Lorentzian is maintained at 30 %.

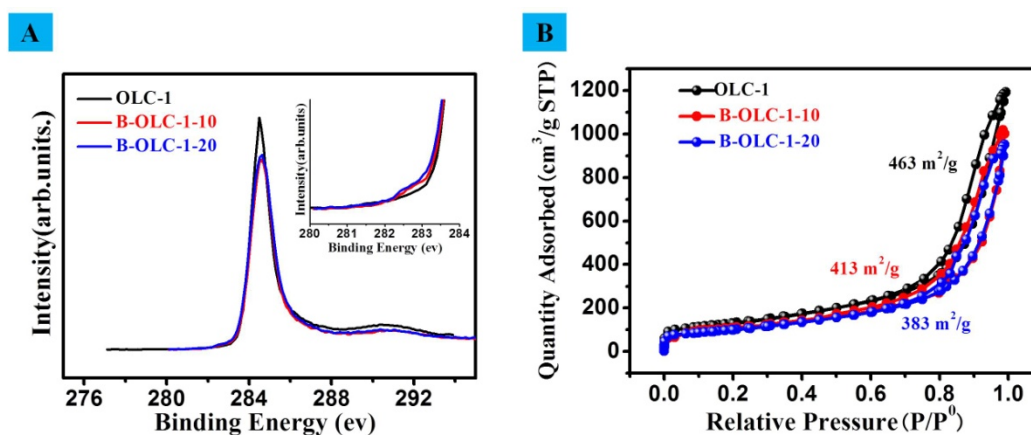

**Fig. S2** (A) XPS C1s spectra of the representative samples. (B) Nitrogen adsorption-desorption isotherm distribution of the representative samples.

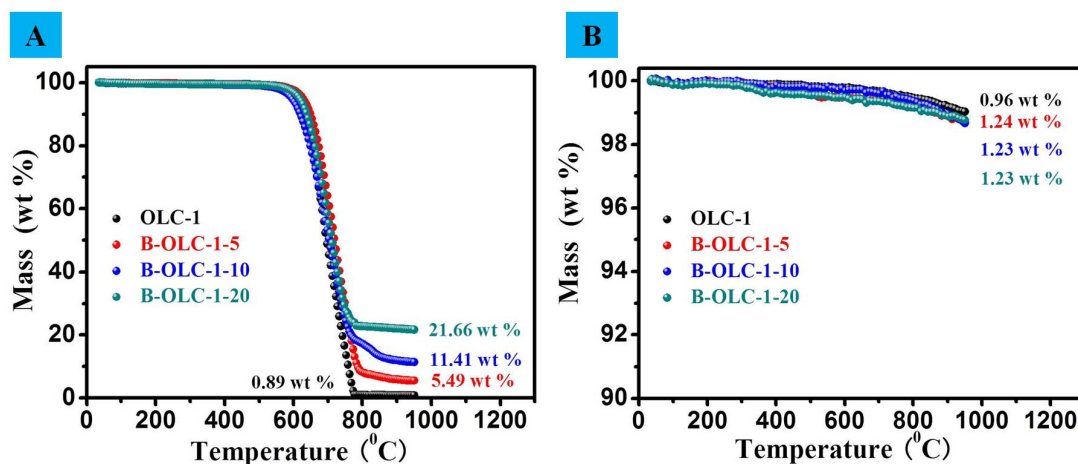

**Fig. S3** TG profiles of various un-doped and doped OLC samples at a heating rate of  $10 \text{ K} \cdot \text{min}^{-1}$  under different atmospheres. (A) dry air, (B) argon gas.

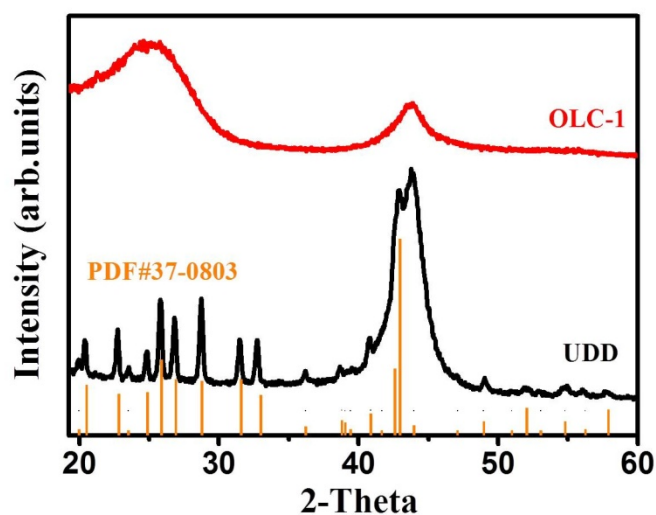

**Fig. S4** XRD patterns of UDD and OLC-1. The orange histogram represents the unpurified  $\text{BaK}_x\text{SO}_4$  (NO. PDF#37-0803) contamination in the commercial UDD.

The combustion residue of pure OLC is about 0.89 wt%, which is mainly attributed to the unpurified  $\text{BaK}_x\text{SO}_4$  in the origin commercial UDD. Besides, the contaminations in the commercial UDD involve  $\text{Fe} < 50 \text{ ppm}$ ,  $\text{Cr} < 10 \text{ ppm}$ ,  $\text{Al} < 50 \text{ ppm}$ ,  $\text{Cu} < 10 \text{ ppm}$ ,  $\text{Mg} < 10 \text{ ppm}$ ,  $\text{Ti} < 10 \text{ ppm}$  and  $\text{Ca} < 50 \text{ ppm}$ , which are tested by inductively coupled plasma emission spectrometer (ICP).

**Table S2.** Work functions and valence band edges of various pristine and low doped-OLC samples obtained by UPS.

| Sample                                 | OLC-2 | B-OLC-2-5 | OLC-3 | B-OLC-3-5 | OLC-4 | B-OLC-4-5 |
|----------------------------------------|-------|-----------|-------|-----------|-------|-----------|
| Preparation Temperature (°C)           | 1800  | 1800      | 2100  | 2100      | 2400  | 2400      |
| Work Function (eV)                     | 4.72  | 4.75      | 4.96  | 4.99      | 5.24  | 5.26      |
| Valence Band Edge(eV)                  | 1.35  | 1.37      | 1.42  | 1.43      | 1.50  | 1.50      |
| The content of BC <sub>3</sub> species | ----- | ~0.18     | ----- | ~0.11     | ----- | ~0.1      |

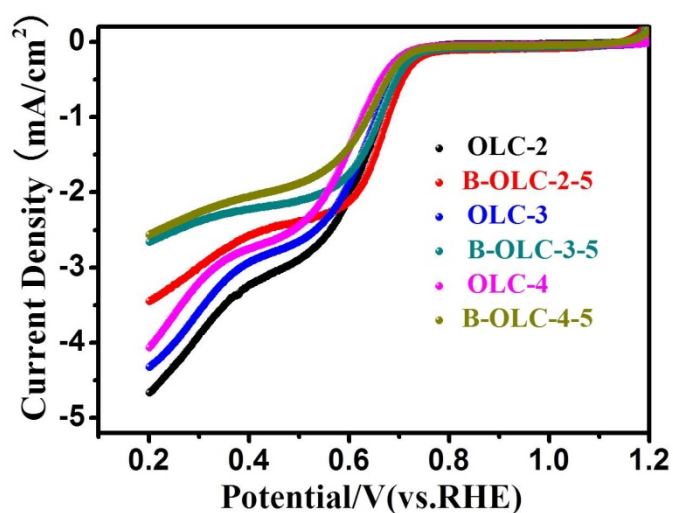

**Fig.S5** Rotating disk electrode (RDE) voltammograms recorded with OLC-2, B-OLC-2-5, OLC-3, B-OLC-3-5, OLC-4 and B-OLC-4-5 in O<sub>2</sub>-saturated 0.1 M KOH at 900 rpm, scan rate: 5 mV s<sup>-1</sup>
